# Supplementary material for: Regionalization and its impact on global runoff simulations: A case study using the global hydrological model WaterGAP3 (v 1.0.0)
Source: Copernicus journal article supplement (doi:10.5194/gmd-2024-47), 2024-03-18
Supplement: Supplementary file [file gmd-2024-47-AC3-supplement.pdf]

## Response to Reviewer 1

We thank the referee for the helpful review and the constructive comments. His/her comments are given below in black, and our responses are in blue. Proposed changes to the manuscript are in red. Additional references are provided at the end of this document.

The article presents a comparison of regionalization methods to estimate the calibration parameter of the WaterGAP3 GHM model in ungauged catchments worldwide. The article presents relevant work, and it is well written. Although, in my opinion, the fact that the methodology relies completely for data and evaluation in the model rest validity to analysis and findings of the results. Nevertheless, if these constraints and their implications are better analyzed and addressed, the paper is publishable.

Thanks for addressing the omission of constraints and implications that may affect the reliability of the findings. To address this issue, we modified the paper by (1) explaining choices better (e.g., why we use basin descriptors derived from model input data), (2) addressing underlying assumptions (e.g., using the difference between calibrated and regionalized values to assess the performance of regionalization by adding a KGE evaluation for one split-sample), and (3) restructuring the result section and creating more convincing figures that address more precisely the difference between the regionalization methods and the impact on run-off simulations.

### General comments:

In several parts of the manuscript, the authors claim they are using new regionalization methods, and that is misleading, they are applying regionalization methods (that are not new) for the first time in the context of the WaterGap model. Please clarify throughout the text.

Thanks for the precise comment. We have clarified throughout the text that the context of the applied methods, i.e., the application for WaterGAP3 on a global scale, is new, but not the methods themselves.

The implementation of regionalization methods is not very well explained, many assumptions and choices are made without proper justification (see specific comments). These may have important impacts in the performance of each regionalization method, unfairly favoring one over another.

Thanks for the valuable, specific comments regarding this issue. We have addressed the comments in detail in the corresponding 'specific comment' section. We modified the text to clarify the assumptions and choices. Moreover, we have modified the 'highly-flexible' kmeans method as (1) the number of clusters was not according to any benchmark and (2) directly using knn to find the most similar donor basins enables an improved assessment of the benefit of using clusters.

I have some reservations with the fact that all regionalization is made within the WaterGAP model, e.g.,

- the use of model input data as basin descriptors, for example "soil storage" coming from a look-up table, does not seem to be a proper descriptor of a basin;

Thanks for raising this issue. We understand that the input for regionalization is critical and appreciate that it is highlighted. As we need (rasterized) globally available data for regionalization, we have decided to use model input as it is already available on the needed spatial resolution. We did so, as the used model input is mainly based on global data products that are mostly only adapted to fit the spatial resolution (e.g., waterbody information, digital elevation map). The "soil storage" differs from that as it is a combination of three pieces of information: soil information derived from Batjes (2012), land use information derived from MODIS data (Friedl & Sulla-Menashe, 2019), and estimated rooting depth coming from a look-up table (used to match the defined land use classes from MODIS data). We could have used all three pieces of information separately, and we did so partly as we integrated the mean fraction of forest to account for different land use information. However, as we noticed that the soil storage size significantly influenced the simulation during manual simulation runs, we anticipated similar effects for regionalization. Therefore, we decided to directly implement the estimated soil storage size as a basin descriptor. However, to enhance the study's reproducibility and reinforce the findings' reliability, we added the calculated soil storage size as a map in the Appendix A and the provided the data as .tiff in the Zenodo repository.

- the selection of these descriptors based on the correlation with the calibrated parameter;

Thanks for mentioning this aspect and providing food for thought. As we estimate only one parameter, the most straightforward approach is using the correlation between this parameter and the potential descriptors (also done by others, even for more than one calibrated parameter, e.g., Merz & Blösch, 2004; Wagener & Wheater, 2006). However, it should be acknowledged that alternative approaches exist, e.g., using flow characteristics (e.g., Pagliero et al., 2019), which aim to relate basin descriptors to hydrological processes and, thus, model behavior.

Given the low correlation coefficients between the descriptors and calibrated parameters, we proceeded to modify the analyzed subset to reduce the impact of the selection on the study. Therefore, we run the regionalization methods with all descriptors additionally to evaluate the descriptor selection. Furthermore, to ascertain the advantage of integrating climatic descriptors, we run the regionalization methods using all physiographic or all climatic descriptors.

Additionally, the discussion of the low correlation coefficients is extended by presenting the results in the context of other studies.

- the evaluation of each method by comparing regionalized gamma versus calibrated gamma (if I understood correctly);

As WaterGAP3 is very demanding in terms of computational time, it is advisable to take advantage of the calibration result corresponding to the clear global optimum of the single calibration parameter. So, being closer to the calibrated value means becoming closer to the global optimum and thus better in regionalization. However, as the sensitivity of the calibration parameter changes between basins and depends on the parameter value itself, we admit there is the need to validate the assumption that the differences between calibrated and regionalized values result in differences in the simulation. Therefore, we (1) formulate the underlying assumption clearly in the text and (2) include an evaluation of KGE values of a representative split-sample to validate it. Moreover, when assessing the differences between regionalized and calibrated values, we changed the MAE to logMAE to account for the increasing sensitivity for smaller parameter values. To show this change in sensitivity, we added an Appendix section (see Appendix B) presenting a brief sensitivity analysis regarding the calibration parameter.

- and also, to use as benchmark the resulting parameter distribution of a previous version of the model at a different resolution and regionalization method.

We are sorry that it was not clear that the benchmark is not the parameter distribution of WaterGAP2 itself but only the regression equation. This regression equation was fitted to our data and defined as benchmark-to-beat. We clarified this in the text.

### Specific comments:

Line 131, explain the standard calibration approach and sufficient performance indicators referred here.

Thanks for highlighting that mentioning the 'standard calibration' was not sufficiently indicating that it refers to the calibration procedure described in ll. 97-107. To clarify this, we added the term 'above-described' (ll. 133). Moreover, we added information about the implemented search algorithm to the calibration description (ll. 99-107).

Further, to create more valid results, we implemented one additional performance criterion (monthly  $KGE \geq 0.4$ ) to select gauged basins used in this study, reducing the number of examined basins from formerly 1,236 to 933. (s. ll. 142-151)

Line 148-149, explain what do you mean with the need to define sensitive parameters for a better calibration of WaterGAP3 if the model only has one calibration parameter.

Thanks for highlighting the difficulty of understanding this statement. To enhance the clarity, we have revised the paragraph to be more comprehensible (ll. 149-160). In particular, we added the following explanation to answer the raised question: "Future studies are needed to achieve the latter, as WaterGAP3 contains many hard-

coded parameters or parameters defined by look-up tables that need to be analyzed to identify and adjust sensitive parameters more accurately during calibration” (ll. 157-159).

Line 162-163: I would say you are minimizing redundant information, but not avoiding it, some of the descriptors are correlated.

Thanks for the suggestion; we applied it to the text and changed 'avoid' to 'minimise' (ll. 175).

Line 173 to 177: To use the calibrated parameter to select descriptors comes with many drawbacks, as you explain here, why then not to choose another more independent variable to define meaningful basin descriptors?

We have chosen the calibrated parameter values to define basin descriptors, as the main objective is to imitate the model's parameter calibration in gauged regions for ungauged regions. As we estimate one parameter, it is a plausible assumption to look directly for relationships between basin descriptors and the calibrated values (e.g., done by Merz & Blöschl, 2004; Wagener & Wheater, 2006, even for multiple calibration parameters). We revised the text to provide a rationale (and alternatives) for this approach (ll. 180–184) and discussed the low correlation in the light of other studies (ll. 197-202).

Line 177: More than a complex relationship, a very uncertain one, if there is one at all.

Thanks for this opportunity to consider this matter further. To reduce the impact of the (uncertain) descriptor selection in our study, given the low correlation coefficients, we slightly modified our study design to reduce the impact of the correlation-based selection on the tested descriptor sets: Instead of using only the (weakly) correlated climatic and physiographic descriptors in the subsets "cl" and "p", we use now all climatic and physiographic descriptors. This modification enables the assessment of the impact of using only climatic or physiographic descriptors without being influenced by the selection mentioned above (s. ll. 206-215).

Table 1: Define IG(&) in the Table

Thanks for the hint. We now defined it in the table with a <sup>1</sup> (s. ll. 196/197).

Line 210 to 214: Please clarify, the evaluation is done by comparing regionalized gamma with calibrated gamma? Or model predictions? Why a MAE value of 2.1?

Thanks for highlighting that the evaluation method lacked clarity. We now comprehensively emphasize that and why we use the difference between regionalized and calibrated values for evaluation. (ll. 241-253). As stated above, we changed the MAE to logMAE to account for the varying sensitivity of  $\gamma$ . Furthermore, we added a KGE evaluation to validate the assumption that smaller logMAE values lead to higher discharge accuracy.

Formerly, we added information on an MAE of 2.1 to create a reference for the MAE (comparable to zero for the NSE). We removed such information from the text because it was more confusing than helpful. Instead, we refer to our benchmark-to-beat for evaluation purposes (which is also more in line with the study setup). Thanks!

Line 220 to 222: Please explain better the "tuning approach", what are gamma 1 and gamma 2?

Thanks for highlighting that the description of the tuning required further information. We added information regarding  $\gamma_1$  and  $\gamma_2$  in the section ll. 229-235. Moreover, restructuring the result section (s. Chapter 3), we have created a result chapter (s. Chapter 3.1) to analyze the effect of tuning more systematically. Here, we also define that using kmeans with three centers on the calibrated  $\gamma$  values results in tuning thresholds  $\gamma_1 \approx 1.1$  and  $\gamma_2 \approx 3.4$  (see ll. 325).

Line 252, why three clusters?

Thanks for the hint that we forgot to mention how we have determined the number of clusters. We have used several indices based on the R-Package nbClust. We have added the information accordingly (ll. 289-292).

Line 259, explain why the "highly flexible version" uses 162 clusters?

We have noted that the "highly flexible version" only indirectly satisfies our goal of analyzing if the clustering beforehand applying knn enhances the estimate. We have now implemented knn directly, where each basin refers to one "cluster", meaning that we used a knn-algorithm that defines the most similar donor basin for each pseudo-ungauged basin (based on Euclidean distance between min-max-normalized attributes). **We have revised the text accordingly (ll. 298-301) and adopted all figures in the restructured result section (s. Chapter 3) to evaluate the effect of using knn without clustering beforehand.**

Line 305, re-write to clarify.

**This sentence is no longer present in the text.** Instead of analyzing the boxplots, we now focus on the median logMAE value of the split-sample test ensemble (s. Table 2 in ll. 394/395) and provide the boxplot in Appendix D. The newly introduced table enhances the analysis, providing more detailed insights into the varying basin descriptors' roles. Moreover, we have significantly improved the reliability of our work by sharpening the conditions for the basins used in the study, reducing the number of evaluated basins. We have also slightly modified the study design by using other subsets for 'cl' and 'p' (including all descriptors instead of using only the (weakly) correlated ones).

Line 306 to 308, re-write to clarify the meaning of the sentence. I believe that it has to do more with the relevance of the descriptors included in explaining catchment behavior, or in this case calibrated parameter gamma.

**This sentence is no longer present in the text.** Instead of analyzing the boxplots, we now focus on the median logMAE value of the split-sample test ensemble (s. Table 2 in ll. 394/395) and provide the boxplot in Appendix D. The newly introduced table enhances the analysis, providing more detailed insights into the varying basin descriptors' roles. Moreover, we have significantly improved the reliability of our work by sharpening the conditions for the basins used in the study, reducing the number of evaluated basins. We have also slightly modified the study design by using other subsets for 'cl' and 'p' (including all descriptors instead of using only the (weakly) correlated ones).

Line 317-317: Change "However" for "Therefore"?, if I understand the intention of the sentence correctly.

Thanks. **We have changed 'however' to 'therefore' accordingly (ll. 379).**

Line 356-357, the "high flexible" k-means results are not in Figure 4? They need to be added.

**We included the results for the newly implemented knn algorithm in all relevant figures in Chapter 3.** The algorithm knn is now used instead of the "highly flexible" k-means as the "highly flexible" k-means does not entirely satisfy what we seek to analyze (see above).

Line 358 to 361: I do not understand this statement, why and how a regionalization method will "extract" information from the descriptors. Pagliero et al. (2019) is not correctly cited in the context of this statement.

Due to the changes in our study design (more strictly defined well-behaving basins, other sets of descriptors, and modification of the "highly-flexible" kmeans version), **this paragraph is no longer present in the text** as (1) we modified the "highly-flexible" version to be more appropriate, and (2) the best variant of the more appropriate "highly-flexible" version leads to comparable results to the best variant of the SI approach. Moreover, when discussing information use, we now avoid the term "extract information", which might give rise to confusion, and prefer "using data more efficiently" instead.

Figure 5d: I have reservations to the validity of comparing global distribution of gamma for WG2 and WG3 given they have different resolutions. Please comment whether this is an issue for this comparison.

We are sorry that it was not clear that the benchmark is not the parameter distribution of WaterGAP2 itself but only the regression equation. This regression equation was fitted to our data and defined as benchmark-to-beat. **We have modified the text to clarify it (s. above and ll. 255-263).**

Figure 6, what was the reason to choose the year 1989 for this comparison? Seems arbitrary. Same for year 2010 in Figure 7. Why not use an average year, or the driest/wetter year of the period.

Thanks for the suggestion. As we restructured Chapter 3, Figures 6 and 7 changed. We formerly displayed only exemplary years to highlight the local impacts of regionalization. However, we implement the suggestion in the modified figures, as we believe it leads to more meaningful results. In this figure, we now evaluate the variation in run-off induced by varying regionalization methods for the complete simulation period from 1980-2016.

Line 453-454. This statement contradicts itself. Basin descriptors selected for regionalization are of crucial importance because they need to be selected due to the amount of information they contain.

This sentence is no longer present in the text. Instead of analyzing the boxplots, we now focus on the median logMAE value of the split-sample test ensemble (s. Table 2 in ll. 394/395) and provide the boxplot in Appendix D. The newly introduced table enhances the analysis, providing more detailed insights into the varying basin descriptors' roles. Moreover, we have significantly improved the reliability of our work by sharpening the conditions for the basins used in the study, reducing the number of evaluated basins. We have also slightly modified the study design by using other subsets for 'cl' and 'p' (including all descriptors instead of using only the (weakly) correlated ones).

Line 459: use a more academic term instead of "blurring".

This sentence is no longer present in the text due to the restructuring of Chapter 3.

## References

- Batjes, N. H., ISRIC-WISE derived soil properties on a 5 by 5 arc-minutes global grid (ver. 1.2). Report 2012/01, ISRIC – World Soil Information, Wageningen, [dataset] accessed on 2020-06-22 from <https://data.isric.org/geonetwork/srv/eng/cata-log.search#/metadata/82f3d6b0-a045-4fe2-b960-6d05bc1f37c0>, 2012.
- Friedl, M., Sulla-Menashe, D.: MCD12Q1 MODIS/Terra+Aqua Land Cover Type Yearly L3 Global 500m SIN Grid V006,. NASA EOSDIS Land Processes DAAC, [dataset] accessed on 2020-11-30 from <https://doi.org/10.5067/MODIS/MCD12Q1.006>, 2019.
- Merz, R., Blöschl, G.: Regionalization of catchment model parameters, Journal of Hydrology, 287, 95-123, <https://doi.org/10.1016/j.jhydrol.2003.09.028>, 2004.
- Wagener, T., & Wheater, H. S.: Parameter estimation and regionalization for continuous rainfall-runoff models including uncertainty, Journal of Hydrology, 320, 132-154, <https://doi.org/10.1016/j.jhydrol.2005.07.015>, 2006.
